# Supplementary material
Source: PubMed Central journal article supplement (PMC3804331)
Supplement: NIHMS396411-supplement-01.pdf [file NIHMS396411-supplement-01.pdf]

Other published versions of this review

Classification pending references

## Data and analyses

### 1 Intravitreal triamcinolone acetonide injection versus other treatment

| Outcome or Subgroup                                                   | Studies | Participants | Statistical Method             | Effect Estimate          |
|-----------------------------------------------------------------------|---------|--------------|--------------------------------|--------------------------|
| 1.1 <a href="#">Change in visual acuity (LogMAR)</a>                  | 3       |              | MD(IV, Fixed, 95% CI)          | Subtotals only           |
| 1.1.1 At 3 months                                                     | 3       |              | MD(IV, Fixed, 95% CI)          | -0.15[-0.21, -0.09]      |
| 1.1.2 At 6 months                                                     | 2       |              | MD(IV, Fixed, 95% CI)          | -0.23[-0.33, -0.13]      |
| 1.1.3 At 9 months                                                     | 1       |              | MD(IV, Fixed, 95% CI)          | -0.29[-0.47, -0.11]      |
| 1.1.4 At 24 months                                                    | 1       |              | MD(IV, Fixed, 95% CI)          | -0.11[-0.20, -0.03]      |
| 1.2 <a href="#">Gain of one or more lines visual acuity</a>           | 2       |              | Risk Ratio(M-H, Fixed, 95% CI) | Subtotals only           |
| 1.2.1 At 3 months                                                     | 2       | 105          | Risk Ratio(M-H, Fixed, 95% CI) | 2.85[1.59, 5.10]         |
| 1.2.2 At 6 months                                                     | 1       | 32           | Risk Ratio(M-H, Fixed, 95% CI) | 1.25[0.66, 2.38]         |
| 1.2.3 At 24 months                                                    | 1       | 69           | Risk Ratio(M-H, Fixed, 95% CI) | 2.17[1.15, 4.11]         |
| 1.3 <a href="#">Gain of three or more lines visual acuity</a>         | 2       |              | Risk Ratio(M-H, Fixed, 95% CI) | Subtotals only           |
| 1.3.1 At 3 months                                                     | 2       | 105          | Risk Ratio(M-H, Fixed, 95% CI) | 1.92[0.50, 7.40]         |
| 1.3.2 At 24 months                                                    | 1       | 69           | Risk Ratio(M-H, Fixed, 95% CI) | 4.12[0.48, 34.99]        |
| 1.4 <a href="#">Change in retinal thickness</a>                       | 2       |              | MD(IV, Fixed, 95% CI)          | Subtotals only           |
| 1.4.1 At 3 months                                                     | 2       |              | MD(IV, Fixed, 95% CI)          | -131.97[-169.08, -94.86] |
| 1.4.2 At 6 months                                                     | 1       |              | MD(IV, Fixed, 95% CI)          | -135.00[-194.50, -75.50] |
| 1.4.3 At 9 months                                                     | 1       |              | MD(IV, Fixed, 95% CI)          | -133.00[-199.86, -66.14] |
| 1.4.4 At 24 months                                                    | 1       |              | MD(IV, Fixed, 95% CI)          | -59.00[-103.50, -14.50]  |
| 1.5 <a href="#">Resolution of at least one grade of macular edema</a> | 1       |              | Risk Ratio(M-H, Fixed, 95% CI) | No totals                |
| 1.5.1 At 3 months                                                     | 1       |              | Risk Ratio(M-H, Fixed, 95% CI) | No totals                |

### 2 Intravitreal fluocinolone acetonide implant versus other treatment

| Outcome or Subgroup                                           | Studies | Participants | Statistical Method             | Effect Estimate |
|---------------------------------------------------------------|---------|--------------|--------------------------------|-----------------|
| 2.1 <a href="#">Gain of three or more lines visual acuity</a> | 2       |              | Risk Ratio(M-H, Fixed, 95% CI) | No totals       |
| 2.1.1 At 12 months                                            | 1       |              | Risk Ratio(M-H, Fixed, 95% CI) | No totals       |
| 2.1.2 At 36 months                                            | 1       |              | Risk Ratio(M-H, Fixed, 95% CI) | No totals       |

## Figures

## Sources of support

### Internal sources

- No sources of support provided

### External sources

- Contract N-01-EY2-1003, National Eye Institute, National Institutes of Health, USA

## Feedback
